# Supplementary material for: Cost-effectiveness of gefitinib, icotinib, and pemetrexed-based chemotherapy as first-line treatments for advanced non-small cell lung cancer in China
Source: PubMed Central journal article supplement (PMC5354787; doi:10.18632/oncotarget.14310), 2016-12-27
Supplement: oncotarget-08-9996-s001.pdf [file oncotarget-08-9996-s001.pdf]

## **Cost-effectiveness of gefitinib, icotinib, and pemetrexed-based chemotherapy as first-line treatments for advanced non-small cell lung cancer in China**

### **APPENDIX TABLE**

**Appendix Table 1: Characteristics of included studies.**

**See Supplementary File 1**
